# Supplementary material
Source: Springer Nature journal article supplement (https://www.springermedizin.de/resource/supplementary/12885_2006_551_MOESM2_ESM.pdf/9469736)

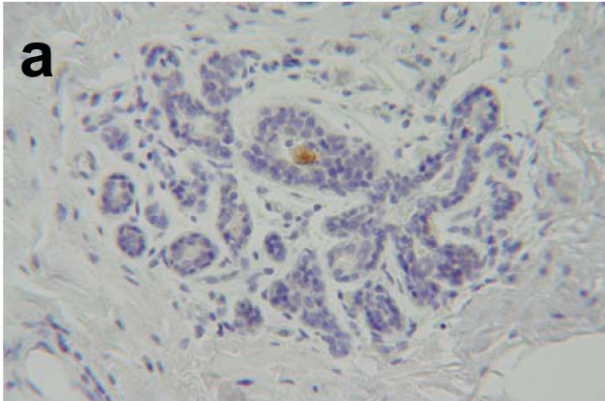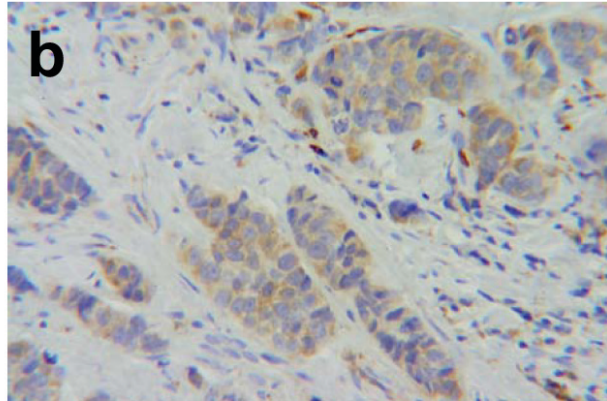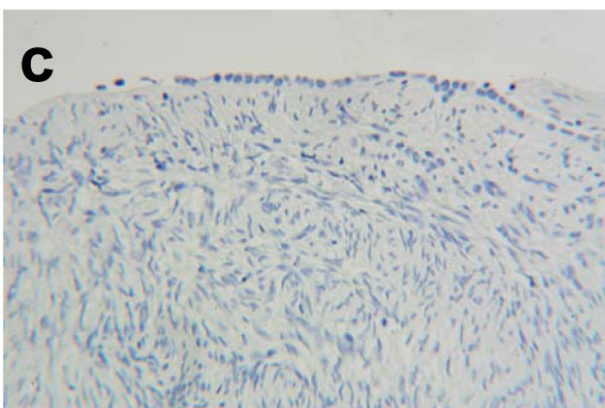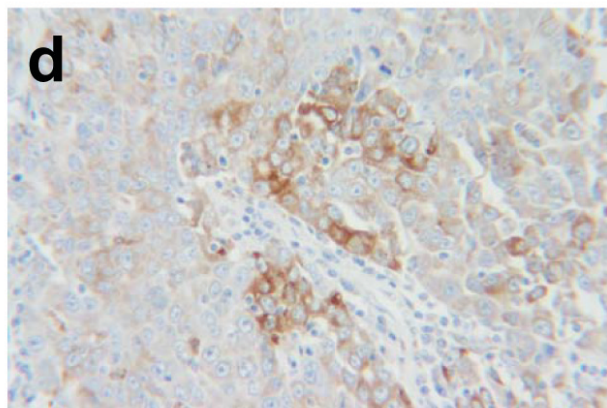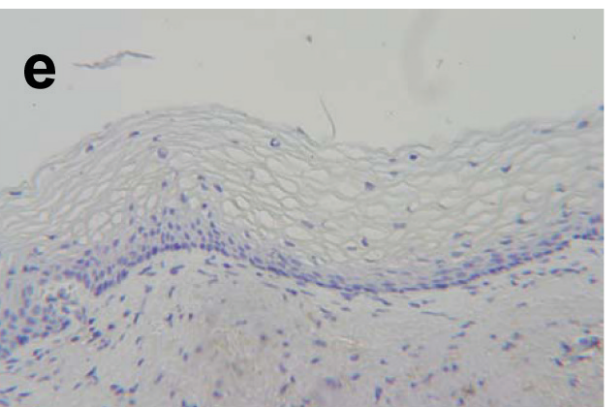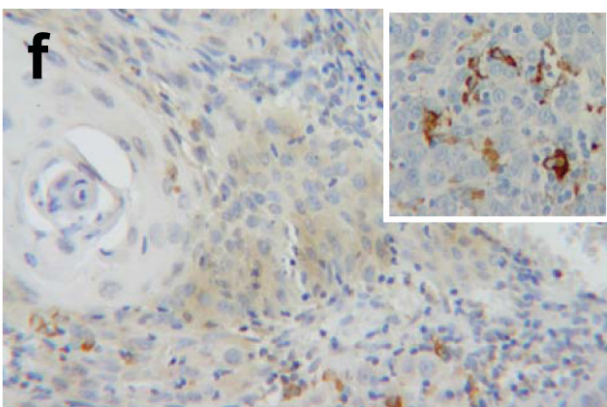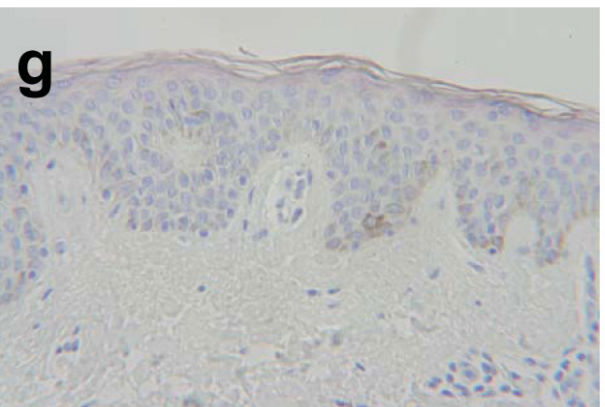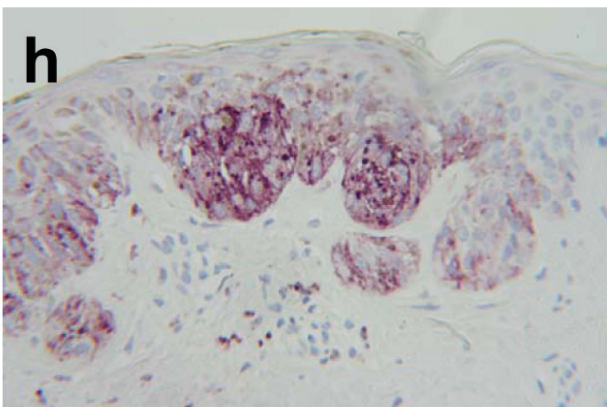

Supplement: MOESM2 [file 9469736]
